# Supplementary material for: Cost-Effectiveness of Implantable Cardioverter–Defibrillators
Source: Atypon-hosted journal article supplement (doi:10.1056/nejmsa051989), 2005-10-05
Supplement: nejm_sanders_1471sa1.pdf [file nejm_sanders_1471sa1.pdf]

## Supplementary Appendix

This appendix has been provided by the authors to give readers additional information about their work.

Supplement to: Sanders GD, Hlatky MA, Owens DK. Cost-effectiveness of implantable cardioverter-defibrillators. *N Engl J Med* 2005;353:1471-80.

## Supplementary Appendix: Input Variables and Sources

| Clinical Trial                                                                 | Inclusion Criteria                                                                                                                                                                                                                                |                                                                                                                 |
|--------------------------------------------------------------------------------|---------------------------------------------------------------------------------------------------------------------------------------------------------------------------------------------------------------------------------------------------|-----------------------------------------------------------------------------------------------------------------|
| MADIT-I<br>CABG-PATCH<br>MUSTT                                                 | MI three weeks or more before study; unsustained VT; EF $\leq$ 35%<br>Scheduled for CABG, EF $\leq$ 35%, abnormalities on SAECG<br>CAD, EF $\leq$ 40%, asymptomatic non-sustained VT within 6 months and<br>not within 4 days after an MI or CABG |                                                                                                                 |
| MADIT-II<br>DEFINITE                                                           | MI one month or more before study; EF $\leq$ 30%<br>EF $\leq$ 35%, ambient arrhythmias, symptomatic heart failure, presence of<br>nonischemic cardiomyopathy                                                                                      |                                                                                                                 |
| COMPANION                                                                      | NYHA III or IV, EF $\leq$ 35%, QRS = 120 ms, PR > 150 ms, sinus<br>rhythm, and a hospitalization for the treatment of CHF in the<br>preceding 12 months                                                                                           |                                                                                                                 |
| DINAMIT                                                                        | Within 4 to 40 days of an MI, EF $\leq$ 35%, impaired autonomic tone by<br>heart rate variability                                                                                                                                                 |                                                                                                                 |
| SCD-HeFT                                                                       | NYHA class II or III symptoms, EF $\leq$ 35% and on optimal medical<br>therapy                                                                                                                                                                    |                                                                                                                 |
| Input Variable                                                                 | Base-Case<br>Estimate (Range)                                                                                                                                                                                                                     | Source                                                                                                          |
| <i>Control therapy clinical variables</i>                                      |                                                                                                                                                                                                                                                   |                                                                                                                 |
| Annual total mortality, %                                                      |                                                                                                                                                                                                                                                   |                                                                                                                 |
| MADIT-I                                                                        | 19.5                                                                                                                                                                                                                                              | 1                                                                                                               |
| CABG-PATCH                                                                     | 8.5                                                                                                                                                                                                                                               | 2                                                                                                               |
| MUSTT                                                                          | 16.7                                                                                                                                                                                                                                              | 3                                                                                                               |
| MADIT-II                                                                       | 12.4                                                                                                                                                                                                                                              | 4                                                                                                               |
| DEFINITE                                                                       | 7.3                                                                                                                                                                                                                                               | 5                                                                                                               |
| COMPANION                                                                      | 18.9                                                                                                                                                                                                                                              | 6                                                                                                               |
| DINAMIT                                                                        | 7.2                                                                                                                                                                                                                                               | 7                                                                                                               |
| SCD-HeFT                                                                       | 12.3                                                                                                                                                                                                                                              | 8                                                                                                               |
| <i>ICD clinical variables</i>                                                  |                                                                                                                                                                                                                                                   |                                                                                                                 |
| Efficacy of ICD in reducing total mortality, %                                 |                                                                                                                                                                                                                                                   |                                                                                                                 |
| MADIT-I                                                                        | 0.46 (0.26, 0.82)                                                                                                                                                                                                                                 | 1                                                                                                               |
| CABG-PATCH                                                                     | 1.07 (0.81, 1.42)                                                                                                                                                                                                                                 | 2                                                                                                               |
| MUSTT                                                                          | 0.45 (0.32, 0.63)                                                                                                                                                                                                                                 | 3                                                                                                               |
| MADIT-II                                                                       | 0.69 (0.51, 0.93)                                                                                                                                                                                                                                 | 4                                                                                                               |
| DEFINITE                                                                       | 0.65 (0.40, 1.06)                                                                                                                                                                                                                                 | 5                                                                                                               |
| COMPANION                                                                      | 0.64 (0.48, 0.86)                                                                                                                                                                                                                                 | 6                                                                                                               |
| DINAMIT                                                                        | 1.08 (0.76, 1.55)                                                                                                                                                                                                                                 | 7                                                                                                               |
| SCD-HeFT                                                                       | 0.77 (0.62, 0.96)                                                                                                                                                                                                                                 | 8                                                                                                               |
| Frequency of ICD generator replacement, y                                      | 5 (2–9)                                                                                                                                                                                                                                           | Estimate based on <sup>9-12</sup> , Medtronic and Guidant<br>unpublished data, <sup>13</sup> and expert opinion |
| Probability of lead problems requiring surgical<br>intervention (20 months), % | 2.4 (0–5)                                                                                                                                                                                                                                         | 4                                                                                                               |
| Duration of ICD benefit                                                        | Lifetime (3, 5, 12)                                                                                                                                                                                                                               | Assumed                                                                                                         |
| <i>Control therapy costs, \$</i>                                               |                                                                                                                                                                                                                                                   |                                                                                                                 |
| Monthly inpatient costs                                                        | 494†<br>(85-2500)                                                                                                                                                                                                                                 | MITI registry, unpublished data and <sup>14</sup>                                                               |
| Monthly outpatient costs                                                       | 50 (0-100)                                                                                                                                                                                                                                        | <sup>15</sup>                                                                                                   |
| <i>ICD costs, \$</i>                                                           |                                                                                                                                                                                                                                                   |                                                                                                                 |
| ICD implantation                                                               | 27,975<br>(10,000–60,000)                                                                                                                                                                                                                         | FY 2005 Medicare Inpatient Hospital Payments<br>and Professional Fees                                           |
| Monthly inpatient costs                                                        | 494†<br>(85-2500)                                                                                                                                                                                                                                 | MITI registry, unpublished data and <sup>14</sup>                                                               |
| Monthly outpatient costs                                                       | 50 (0-100)                                                                                                                                                                                                                                        | <sup>15</sup>                                                                                                   |
| Generator replacement                                                          | 18,390<br>(5,000-30,000)                                                                                                                                                                                                                          | FY 2005 Medicare Inpatient Hospital Payments<br>and Professional Fees                                           |
| <i>Utilities</i>                                                               |                                                                                                                                                                                                                                                   |                                                                                                                 |

|                                               |              |                                                          |
|-----------------------------------------------|--------------|----------------------------------------------------------|
| Baseline health state (Control therapy)       | 0.88 (0.6–1) | 16, 17 18                                                |
| ICD                                           | 0.88 (0.6–1) | Assumed to be equivalent to current health for base case |
| Hospitalization for ICD infection (days lost) | 3.5          |                                                          |
| <i>Other variables</i>                        |              |                                                          |
| Discount rate, %                              | 3 (0–5)      | 19                                                       |

The base-case estimate represents our best estimate for each value. Costs are expressed in 2005 U.S. dollars. †The monthly inpatient cost reported here reflects the average of the first 36 months. ICD = implantable cardioverter defibrillator; MITI = Myocardial Infarction Triage and Intervention, MI = myocardial infarction; EF = ejection fraction; NYHA = New York Heart Classification, SAECG = signal averaged ECG.

## REFERENCES:

1. Moss AJ, Hall WJ, Cannom DS, et al. Improved survival with an implanted defibrillator in patients with coronary disease at high risk for ventricular arrhythmia. Multicenter Automatic Defibrillator Implantation Trial Investigators. *N Engl J Med* 1996;335(26):1933-40.
2. Bigger JT, Jr. Prophylactic use of implanted cardiac defibrillators in patients at high risk for ventricular arrhythmias after coronary-artery bypass graft surgery. Coronary Artery Bypass Graft (CABG) Patch Trial Investigators. *N Engl J Med* 1997;337(22):1569-75.
3. Buxton AE, Lee KL, Fisher JD, Josephson ME, Prystowsky EN, Hafley G. A randomized study of the prevention of sudden death in patients with coronary artery disease. Multicenter Unsustained Tachycardia Trial Investigators. *N Engl J Med* 1999;341(25):1882-90.
4. Moss AJ, Zareba W, Hall WJ, et al. Prophylactic implantation of a defibrillator in patients with myocardial infarction and reduced ejection fraction. *N Engl J Med* 2002;346(12):877-83.
5. Kadish A, Dyer A, Daubert JP, et al. Prophylactic defibrillator implantation in patients with nonischemic dilated cardiomyopathy. *N Engl J Med* 2004;350(21):2151-8.
6. Bristow MR, Saxon LA, Boehmer J, et al. Cardiac-resynchronization therapy with or without an implantable defibrillator in advanced chronic heart failure. *N Engl J Med* 2004;350(21):2140-50.
7. Hohnloser SH, Kuck KH, Dorian P, et al. Prophylactic use of an implantable cardioverter-defibrillator after acute myocardial infarction. *N Engl J Med* 2004;351(24):2481-8.
8. Bardy GH, Lee KL, Mark DB, et al. Amiodarone or an implantable cardioverter-defibrillator for congestive heart failure. *N Engl J Med* 2005;352(3):225-37.
9. Hauser RG. The growing mismatch between patient longevity and the service life of implantable cardioverter-defibrillators. *J Am Coll Cardiol* 2005;45(12):2022-5.
10. Zipes D, Roberts D. Results of the international study of the implantable pacemaker cardioverter-defibrillator. *Circulation* 1995;92:59-65.
11. Saksena S, Poczobutt-Johanos M, Castle LW, et al. Long term multicenter experience with a second generation implantable pacemaker-defibrillator in patients with malignant ventricular tachyarrhythmias. *J Am Coll Cardiol* 1992;19(3):490-9.
12. Gabry MD, Brodman R, Johnston D, et al. Automatic implantable cardioverter-defibrillator: Patient survival, battery longevity and shock delivery analysis. *JACC* 1987;9(6):1349-56.
13. Intrinsic Dual Chamber ICD. (Accessed July 28, 2005, at <http://www.medtronic.com/physician/tachy/icd/intrinsic.html>.)
14. Sanders GD, Hlatky MA, Every NR, et al. Potential cost-effectiveness of prophylactic use of the implantable cardioverter defibrillator or amiodarone after myocardial infarction. *Ann Intern Med* 2001;135(10):870-83.
15. Larsen GC, Manolis AS, Sonnenberg FA, Beshansky JR, Estes NA, Pauker SG. Cost-effectiveness of the implantable cardioverter-defibrillator: effect of improved battery life and comparison with amiodarone therapy. *J Am Coll Cardiol* 1992;19(6):1323-34.
16. Tsevat J, Goldman L, Soukup JR, et al. Stability of time-tradeoff utilities in survivors of myocardial infarction. *Medical Decision Making* 1993;13:161-5.

17. Fryback DG, Dasbach EJ, Klein R, et al. The Beaver Dam health outcomes study: Initial catalog of health state quality factors. *Med Decis Making* 1993;13:89-102.
18. Kuntz KM, Tsevat J, Goldman L, Weinstein MC. Cost-effectiveness of routine coronary angiography after acute myocardial infarction. *Circulation* 1996;94(5):957-65.
19. Lipscomb J, Weinstein MC, Torrance GW. Cost Effectiveness in Health and Medicine. In: Gold MR, Siegel JE, Russell LB, Weinstein MC, eds. New York: Oxford University Press; 1996:214-46.
